# Supplementary material for: On population structure and breeding biology of burrowing crab Dotilla blanfordi Alcock, 1900
Source: PeerJ. 2024 Mar 13;12:e17065. doi: 10.7717/peerj.17065 (PMC10944165; doi:10.7717/peerj.17065)
Supplement: Supplemental Information 1 [file peerj-12-17065-s001.xlsx]

## Sheet: Raw data
Month	Carapace width	Carapace length	Male/Non-ovigerous female/Ovigerous female
August	5.25	4.04	Male		Months	Ambient Temperature (°C)	Water Temperature (°C)
August	5.61	4.11	Male		January	28.1	27.6
August	5.78	4.29	Male		February	28.2	27.6
August	5.93	4.6	Male		March	32.3	29.5
August	5.53	4.72	Male		April	34.3	33.1
August	5.97	4.8	Male		May	33.5	32.2
August	5.07	4.36	Male		June	33.3	31.8
August	5.51	4.14	Male		July	30.5	30.1
August	4.82	4.04	Male		August	28.9	27.8
August	5.13	4.04	Male		September	29.3	28.6
August	5.26	4.4	Male		October	28.8	28.3
August	5.35	4.06	Male		November	27.7	27.3
August	4.78	3.79	Male		December	27.2	26.8
August	4.18	3.88	Male
August	4.65	4.34	Male
August	4.89	4.41	Male
August	5.2	4.55	Male
August	5.22	5.21	Male
August	4.85	4.02	Male
August	4.59	3.78	Male
August	4.83	3.99	Male
August	4.67	3.96	Male
August	4.52	4.05	Male
August	4.99	4.16	Male
August	5.17	4.41	Male
August	4.77	4.48	Male
August	4.6	3.87	Male
August	4.97	4.11	Male
August	5.37	4.57	Male
August	4.6	4.19	Male
August	5.15	4.43	Male
August	5.79	4.54	Male
August	5.04	4.41	Male
August	5.41	4.33	Male
August	3.44	2.92	Male
August	3.99	3.18	Male
August	4.94	4.01	Male
August	5.46	5.15	Male
August	4.24	3.41	Male
August	4.7	3.43	Male
August	4.88	3.78	Male
August	5.82	4.57	Male
August	4.76	3.9	Male
August	5.87	4.59	Male
August	3.81	3.35	Male
August	3.45	2.92	Male
August	4.16	3.49	Male
August	4.93	4.23	Male
August	5.33	4.02	Male
August	5.04	4.5	Male
August	4.87	3.9	Male
August	5.72	4.75	Male
August	4.92	3.87	Male
August	4.74	3.78	Male
August	4.73	3.68	Male
August	4.91	3.38	Male
August	4.31	3.85	Male
August	4.32	3.77	Male
August	4.63	3.69	Male
August	4.16	3.45	Male
August	3.87	4.25	Male
August	4.3	3.56	Male
August	4.27	3.25	Male
August	4.82	3.47	Male
August	5.23	4.1	Male
August	3.94	3.35	Male
August	4.12	3.57	Male
August	3.72	2.8	Male
August	3.5	3.27	Male
August	4.02	3.63	Male
August	3.88	2.96	Male
August	3.23	3.16	Male
September	2.14	1.57	Male
September	5.18	3.97	Male
September	6.17	4.65	Male
September	5.77	4.61	Male
September	6.05	4.56	Male
September	5.74	4.55	Male
September	5.45	4.47	Male
September	5.15	4.16	Male
September	4.81	3.46	Male
September	5.2	4	Male
September	4.09	3.23	Male
September	5.58	4.3	Male
September	4.99	3.81	Male
September	5.79	4.36	Male
September	5.88	4.64	Male
September	5.07	4.36	Male
September	5.61	4.36	Male
September	5.59	4.43	Male
September	5.48	4.3	Male
September	6.09	4.45	Male
September	6.48	4.8	Male
September	5.89	4.56	Male
September	5.44	4.26	Male
September	5.51	4.49	Male
September	4.86	3.72	Male
September	6.17	5.06	Male
September	6.22	4.84	Male
September	6.02	4.69	Male
September	5.67	4.45	Male
September	5.08	4.03	Male
September	5.14	4.37	Male
September	5.99	4.79	Male
September	6.6	5	Male
September	6.36	4.85	Male
September	4.93	3.9	Male
September	6.86	5.08	Male
September	6.04	4.47	Male
September	6.45	4.78	Male
September	5.03	4.08	Male
September	6.65	5.22	Male
September	5.56	4.29	Male
September	5.99	4.04	Male
September	4.43	3.31	Male
September	5.95	4.98	Male
September	5.21	4.28	Male
September	6.24	5.18	Male
September	4.78	3.77	Male
September	5.15	4.35	Male
September	5.15	4.44	Male
September	4.4	3.38	Male
September	4.5	3.6	Male
September	5.68	4.37	Male
September	5.18	3.71	Male
September	6.32	4.93	Male
September	5.67	4.45	Male
September	4.86	3.92	Male
September	6.23	4.83	Male
September	4.84	3.84	Male
September	3.51	2.99	Male
September	6.4	4.87	Male
September	5.61	4.55	Male
September	4.67	3.79	Male
September	5.62	4.04	Male
September	4.78	3.71	Male
September	4.23	3.22	Male
September	6.04	5.09	Male
September	5.47	4.3	Male
September	5.83	4.68	Male
September	5.08	4.13	Male
September	4.55	3.79	Male
September	4.54	3.49	Male
September	5.18	4.03	Male
September	6.65	5.07	Male
September	3.86	3.02	Male
September	5.02	4.21	Male
September	5.25	3.87	Male
September	4.96	3.72	Male
September	4.65	4.74	Male
September	6.2	4.89	Male
September	5.34	4.64	Male
September	5	3.9	Male
September	5.51	4.31	Male
September	5.12	4.09	Male
September	4.82	3.9	Male
September	3.85	3.27	Male
September	4.97	4.14	Male
September	5.84	4.66	Male
September	6.07	4.76	Male
September	6.2	4.77	Male
September	4.54	3.73	Male
September	4.8	3.92	Male
September	4.84	3.73	Male
September	5.23	3.68	Male
September	3.44	2.94	Male
September	4.01	3.22	Male
September	3.81	2.81	Male
September	4.61	3.82	Male
September	3.84	2.91	Male
September	4.04	3.22	Male
September	5.94	4.3	Male
September	5.36	4.26	Male
September	5.02	4.09	Male
September	4.08	3.28	Male
September	5.27	3.71	Male
September	5.15	4.09	Male
September	4.03	3.48	Male
September	5.47	4.12	Male
September	6.57	4.55	Male
September	4.9	3.77	Male
September	3.93	3.13	Male
September	4.44	3.23	Male
October	6.79	4.82	Male
October	5.85	4.54	Male
October	6.04	4.58	Male
October	6.12	4.65	Male
October	2.95	2.33	Male
October	6.13	4.98	Male
October	6.52	4.76	Male
October	6.26	4.89	Male
October	6.24	5.06	Male
October	6.16	4.8	Male
October	5.13	3.58	Male
October	6.36	4.71	Male
October	5.19	4.18	Male
October	5.68	4.72	Male
October	5.08	4.13	Male
October	4.76	3.63	Male
October	5.6	4.75	Male
October	5.12	4.26	Male
October	5.65	4.43	Male
October	4.82	4.03	Male
October	4.63	4.26	Male
October	4.07	3.51	Male
October	4.89	4.67	Male
October	3.75	3.47	Male
October	2.44	2.06	Male
October	4.18	4.03	Male
October	4.2	4.01	Male
October	4.82	4.27	Male
October	2.15	2.06	Male
October	3.57	3.35	Male
October	5.08	4.74	Male
October	4.23	3.68	Male
October	2.21	1.19	Male
October	4.32	3.87	Male
October	5.05	4.51	Male
October	5.1	4.27	Male
October	4.05	3.14	Male
October	4.57	3.33	Male
October	3.5	3.09	Male
October	4.22	3.56	Male
October	3.57	3.13	Male
October	5.77	4.54	Male
October	4.76	3.92	Male
October	4.64	3.62	Male
October	4.88	4.31	Male
October	4.11	3.72	Male
October	4.69	4.21	Male
October	4.45	3.68	Male
October	4.03	3.39	Male
October	1.82	1.67	Male
October	5.89	4.74	Male
October	3.86	3.09	Male
October	5	4.02	Male
October	3.33	2.86	Male
October	3.89	3.62	Male
October	3.01	2.85	Male
October	4.14	3.41	Male
October	4.68	3.97	Male
October	3.72	3.18	Male
October	6.11	4.88	Male
October	4.2	3.41	Male
October	1.49	1.33	Male
October	5.25	4.55	Male
October	5.48	4.27	Male
October	6.18	4.97	Male
October	2.29	2	Male
October	4.11	3.05	Male
October	5.17	4.57	Male
October	4.19	3.9	Male
October	5.01	4.41	Male
October	3.75	3.03	Male
October	3.96	3.53	Male
October	5.52	4.63	Male
October	5.41	4.42	Male
October	5.52	4.36	Male
October	5.45	4.92	Male
October	4.92	4.5	Male
October	4.24	3.54	Male
October	5.64	4.89	Male
October	4.64	3.75	Male
October	5.02	4.59	Male
October	6.22	5.21	Male
October	5.31	4.16	Male
October	4.26	3.66	Male
October	5.46	4.45	Male
October	3.5	3.13	Male
October	4	3.3	Male
October	4.66	4.03	Male
October	5.57	4.46	Male
October	4.72	4.14	Male
October	5.48	4.03	Male
October	6.01	5.33	Male
October	4.66	3.82	Male
October	4.71	4.44	Male
October	2.61	2.3	Male
November	3.36	2.95	Male
November	3.27	2.82	Male
November	5.75	4.59	Male
November	3.18	2.74	Male
November	6.29	4.7	Male
November	6.14	4.62	Male
November	2.5	1.86	Male
November	5.22	4.14	Male
November	3.5	3.05	Male
November	2.74	2.35	Male
November	3.08	2.71	Male
November	2.38	2.11	Male
November	2.61	2.33	Male
November	2.08	1.71	Male
November	2.91	2.54	Male
November	2.49	2.09	Male
November	2.58	2.05	Male
November	3.7	3.03	Male
November	2.91	2.65	Male
November	1.97	1.42	Male
November	2.8	2.46	Male
November	3.07	2.46	Male
November	5.58	4.37	Male
November	3.13	2.7	Male
November	3.27	2.84	Male
November	6.62	4.82	Male
November	3.58	2.99	Male
November	7.14	5.61	Male
November	3.08	2.36	Male
November	3.08	2	Male
November	3.28	2.75	Male
November	6.33	4.66	Male
November	2.87	2.4	Male
November	3.18	2.64	Male
November	2.85	2.29	Male
November	3.39	2.74	Male
November	2.08	1.9	Male
November	6.81	5.51	Male
November	2.62	2.21	Male
November	3.41	2.15	Male
November	2.71	2.5	Male
November	2.24	2.04	Male
November	2.74	2.24	Male
November	3.5	2.75	Male
November	2.98	2.51	Male
November	2.58	2.16	Male
November	2.89	2.57	Male
November	2.78	2.26	Male
November	2.64	2.2	Male
November	4.51	3.44	Male
November	4.32	3.41	Male
November	5.57	4.23	Male
November	2.06	1.8	Male
November	2.64	2.51	Male
November	2.42	2.06	Male
November	2.84	2.45	Male
November	2.86	2.55	Male
November	2.2	1.95	Male
November	2.66	2.17	Male
November	3.23	2.72	Male
November	2.68	2.34	Male
November	2.95	2.49	Male
November	3.06	2.77	Male
November	2.75	2.25	Male
November	1.84	1.01	Male
November	3.25	2.26	Male
November	3.3	2.52	Male
November	2.31	1.8	Male
November	3.75	3.16	Male
November	3.27	2.35	Male
November	2.75	2.22	Male
November	3.8	3.12	Male
November	3.17	2.6	Male
November	2.2	1.18	Male
November	2.23	1.54	Male
November	2.22	1.85	Male
November	2.98	2.61	Male
November	3.66	3.07	Male
November	2.89	2.53	Male
November	2.51	2.15	Male
November	2.17	1.88	Male
November	2.8	2.18	Male
November	2.71	2.22	Male
November	2.34	1.86	Male
November	2.92	2.37	Male
November	2.94	2.17	Male
November	3.5	2.93	Male
November	3.18	2.76	Male
November	2.9	2.44	Male
November	1.07	0.86	Male
December	5.61	4.29	Male
December	3.4	2.66	Male
December	6.35	4.83	Male
December	5.85	4.29	Male
December	6.22	4.49	Male
December	5.89	4.62	Male
December	5.79	4.53	Male
December	6.95	5.28	Male
December	6.55	4.42	Male
December	6.69	5.31	Male
December	6.56	5.2	Male
December	6.78	5.11	Male
December	6.81	5.6	Male
December	5.87	4.43	Male
December	5.41	4.01	Male
December	5.99	4.55	Male
December	5.92	4.34	Male
December	6.21	5.01	Male
December	5.34	3.93	Male
December	3.46	2.92	Male
December	3.2	2.46	Male
December	3.32	2.56	Male
December	5.11	4	Male
December	3.25	2.52	Male
December	3.76	2.94	Male
December	3.4	2.65	Male
December	3.83	2.97	Male
December	2.85	2.3	Male
December	3.67	2.98	Male
December	4.1	3.14	Male
December	3.89	3.15	Male
December	2.93	2.54	Male
December	2.86	2.27	Male
December	2.78	2.39	Male
December	2.13	1.87	Male
December	3.25	2.57	Male
December	4.14	3.32	Male
December	3.32	2.68	Male
December	3.92	3.8	Male
December	3.17	2.58	Male
December	2.84	2.53	Male
December	2.57	2.28	Male
December	2.8	2.67	Male
December	3.4	2.62	Male
December	3.32	2.28	Male
December	4.29	3.19	Male
December	2.56	2.11	Male
December	3.08	2.44	Male
December	2.49	1.91	Male
December	3.34	3.06	Male
December	3.1	2.44	Male
December	3.66	3.22	Male
December	3.09	2.72	Male
December	2.86	2.62	Male
December	2.67	2.31	Male
December	3.41	2.99	Male
December	4.5	3.55	Male
December	3.37	2.72	Male
December	3.04	2.75	Male
December	2.88	2.35	Male
December	3.6	2.56	Male
December	3.19	2.67	Male
December	2.7	2.44	Male
December	3.42	2.62	Male
December	3.86	2.6	Male
December	2.75	2.45	Male
December	3.33	2.39	Male
December	3.45	2.85	Male
December	2.92	2.34	Male
December	2.83	2.26	Male
December	3.62	2.98	Male
December	3.41	2.56	Male
December	3.25	2.66	Male
December	3.02	2.79	Male
December	3.57	2.84	Male
December	3.59	3.08	Male
January	5.77	4.45	Male
January	2.84	2.36	Male
January	2.17	1.91	Male
January	2.39	2.1	Male
January	2.26	1.98	Male
January	2.51	1.84	Male
January	4.15	3.01	Male
January	3.55	3.08	Male
January	3.48	2.92	Male
January	3.87	3.01	Male
January	2.58	2.31	Male
January	4.2	3.61	Male
January	4.99	3.84	Male
January	6.86	5.21	Male
January	6.75	4.89	Male
January	5.1	4.09	Male
January	6.26	5.07	Male
January	7.34	5.72	Male
January	6.4	5.15	Male
January	5.36	4.4	Male
January	3.21	2.67	Male
January	4.55	3.59	Male
January	2.73	2.15	Male
January	3.16	2.41	Male
January	2.32	1.62	Male
January	4.17	3.35	Male
January	4.06	3	Male
January	4.07	3.08	Male
January	6.1	4.84	Male
January	4.23	3.69	Male
January	3.99	3.12	Male
January	3.18	2.81	Male
January	3.51	2.69	Male
January	3.12	2.47	Male
January	5.67	4.46	Male
January	2.47	2.2	Male
January	2.43	1.91	Male
January	3.25	2.68	Male
January	3.81	2.67	Male
January	4.29	2.92	Male
January	3.76	3.12	Male
January	3.19	2.49	Male
January	5.97	4.99	Male
January	4.41	3.72	Male
January	3.58	2.86	Male
January	4.19	3.52	Male
January	3.86	3.38	Male
January	3.95	3.27	Male
January	3.93	3.14	Male
January	3.56	2.82	Male
January	5.32	4.19	Male
January	4.24	3.47	Male
January	4.27	3.45	Male
January	4.11	3.07	Male
January	2.28	1.74	Male
January	4.02	3.08	Male
January	4.21	3.04	Male
January	4.95	3.4	Male
January	4.95	3.88	Male
January	3.19	2.88	Male
January	4.05	3.29	Male
January	5.71	4.55	Male
January	3.17	2.18	Male
January	3.39	2.92	Male
January	5.98	4.79	Male
January	4.67	3.52	Male
January	3.05	2.84	Male
January	2.49	1.88	Male
January	3.61	3.06	Male
January	4.43	3.21	Male
January	4.13	3.01	Male
January	2.09	1.88	Male
January	3.95	3	Male
January	5.79	4.74	Male
January	3.68	3.09	Male
January	4.3	3.46	Male
January	3.44	2.69	Male
January	4.86	3.76	Male
January	4.06	3.21	Male
January	4.39	3.32	Male
January	4.36	3.51	Male
January	3.11	2.5	Male
January	1.73	1.4	Male
January	3.42	2.93	Male
January	3.18	2.78	Male
February	3.61	2.89	Male
February	3.72	2.87	Male
February	3.26	2.7	Male
February	4.62	3.63	Male
February	3.91	3.03	Male
February	2.65	2.03	Male
February	4.72	3.67	Male
February	3.18	2.41	Male
February	3.01	2.5	Male
February	4.51	3.29	Male
February	4.46	3.87	Male
February	3.06	2.46	Male
February	4.41	3.66	Male
February	3.31	2.91	Male
February	5.21	4.37	Male
February	4.9	3.94	Male
February	4.64	3.44	Male
February	4.61	3.42	Male
February	2.96	2.35	Male
February	2.25	2.13	Male
February	4.43	3.42	Male
February	2.01	1.74	Male
February	4.46	3.55	Male
February	4.76	3.82	Male
February	4.33	3.82	Male
February	5.35	4.06	Male
February	4.68	3.82	Male
February	3.74	3.17	Male
February	4.02	2.99	Male
February	4.64	3.91	Male
February	4.85	3.99	Male
February	3.42	2.98	Male
February	3.44	2.75	Male
February	5.72	4.63	Male
February	4.21	3.51	Male
February	4.01	3.58	Male
February	5.37	4.66	Male
February	4.58	3.76	Male
February	4.78	3.94	Male
February	4.46	3.73	Male
February	2.69	2.3	Male
February	2.92	2.27	Male
February	3.09	2.57	Male
February	2.58	2.14	Male
February	2.8	2.21	Male
February	2.16	1.82	Male
February	2.33	2.03	Male
February	2.9	2.44	Male
February	3	2.55	Male
February	2.54	2.24	Male
February	2.49	1.78	Male
February	2.36	1.95	Male
February	2.37	1.98	Male
February	2.31	1.77	Male
February	2.52	2.19	Male
February	3.47	2.66	Male
February	2.49	2.01	Male
February	2.83	2.01	Male
February	2.36	2.1	Male
February	2.43	2.16	Male
February	2.24	2.04	Male
February	1.98	1.74	Male
February	2.82	2.35	Male
February	2.89	2.61	Male
February	1.93	1.58	Male
February	1.46	1.2	Male
March	5.56	4.45	Male
March	5.44	4.42	Male
March	3.91	2.93	Male
March	4.75	3.49	Male
March	2.83	1.89	Male
March	2.61	2.28	Male
March	4.17	4.69	Male
March	4.67	3.66	Male
March	5.15	4.01	Male
March	3.72	2.06	Male
March	4.89	3.81	Male
March	4.94	3.79	Male
March	3.79	3.01	Male
March	3.15	2.67	Male
March	3.19	2.6	Male
March	3.33	2.86	Male
March	3.67	3.06	Male
March	2.61	2.12	Male
March	3.3	2.69	Male
March	5.73	4.06	Male
March	6.25	4.51	Male
March	3.43	2.71	Male
March	5.59	4.39	Male
March	5.16	3.27	Male
March	3.86	2.8	Male
March	5.1	3.82	Male
March	4.85	3.61	Male
March	4.93	3.91	Male
March	4.85	3.54	Male
March	3.33	2.4	Male
March	4.42	3.38	Male
March	3.09	2.49	Male
March	5.15	3.78	Male
March	5.1	4.07	Male
March	2.88	2.07	Male
March	2.18	1.79	Male
March	4.21	3.23	Male
March	2.58	2	Male
March	2.52	1.91	Male
March	3.42	2.53	Male
March	3.79	2.84	Male
March	3.13	2.61	Male
March	3.62	2.7	Male
March	3.13	2.49	Male
March	3.46	2.99	Male
March	3.8	3.19	Male
March	4.05	3.19	Male
March	2.88	2.49	Male
March	3.24	2.7	Male
March	3.03	2.5	Male
March	2.75	2.32	Male
March	5.46	4.21	Male
March	3.29	2.67	Male
March	4.44	3.43	Male
March	3.29	2.42	Male
March	3.83	3.02	Male
March	4.36	3.33	Male
March	3.28	2.6	Male
March	3.82	3.26	Male
March	4.32	3.95	Male
March	2.63	2.1	Male
March	2.68	2.08	Male
March	2.28	1.9	Male
March	5.41	4.35	Male
March	4.29	3.11	Male
March	3.96	2.99	Male
April	5.22	3.97	Male
April	5.15	4.1	Male
April	3.6	2.73	Male
April	5.16	4.67	Male
April	5.31	3.52	Male
April	5.73	4.03	Male
April	6.1	4.67	Male
April	4.6	3.7	Male
April	5.28	4.62	Male
April	4.31	2.9	Male
April	4.12	2.99	Male
April	5.05	3.73	Male
April	3.77	2.88	Male
April	4.65	3.39	Male
April	6.03	4.67	Male
April	5.67	4.42	Male
April	4.84	3.5	Male
April	5.77	4.45	Male
April	5.04	3.73	Male
April	6.85	5.01	Male
April	6.1	4.47	Male
April	5.9	4.13	Male
April	5.94	4.84	Male
April	5.53	4.17	Male
April	5.93	4.6	Male
April	5.03	3.94	Male
April	5.48	4.18	Male
April	5.5	3.89	Male
April	5.26	4.2	Male
April	5.15	3.55	Male
April	5.59	4.18	Male
April	5.22	3.89	Male
April	4.34	3.36	Male
April	5.24	3.68	Male
April	4.92	3.82	Male
April	3.84	2.78	Male
April	3.72	2.99	Male
April	3.8	2.74	Male
April	4.09	3.18	Male
April	4.53	3.46	Male
April	4.37	2.92	Male
April	4.4	3.3	Male
April	4.07	3.05	Male
April	3.84	2.92	Male
April	3.65	3.06	Male
April	4	2.98	Male
April	3.89	2.97	Male
April	4.04	3.13	Male
April	3.46	2.59	Male
April	3.68	2.44	Male
April	3.28	1.91	Male
April	3.43	2.85	Male
April	3.65	2.9	Male
April	3.26	2.33	Male
April	3.74	2.83	Male
April	3.74	2.7	Male
April	3.17	2.39	Male
April	3.25	2.46	Male
April	3.17	2.3	Male
April	2.54	2.18	Male
April	4.22	3.11	Male
April	2.39	2.5	Male
April	3.5	3.02	Male
April	3.22	2.04	Male
April	2.66	2.22	Male
April	2.82	2.38	Male
April	2.75	2	Male
April	2.77	1.86	Male
April	2.64	2.08	Male
April	3.96	2.2	Male
April	3.72	2.47	Male
April	3.95	3.02	Male
April	4.21	2.97	Male
April	3.85	2.5	Male
April	2.76	2.17	Male
April	3.87	3.09	Male
April	4.28	3.03	Male
April	3.57	2.5	Male
April	3.22	2.51	Male
April	3.53	3.62	Male
April	3.21	2.16	Male
April	2.91	2.36	Male
April	2.81	2.57	Male
April	2.85	1.98	Male
April	3.71	2.56	Male
April	2.51	2.91	Male
April	2.33	1.83	Male
April	2.64	2.06	Male
April	2.08	1.91	Male
April	2.37	2.03	Male
April	2.77	2.22	Male
April	2.08	1.87	Male
April	1.96	1.71	Male
April	2.61	2.06	Male
April	1.2	1.48	Male
April	1.56	1.3	Male
May	5.44	4.1	Male
May	6.3	5.2	Male
May	3.93	2.21	Male
May	3.2	2.08	Male
May	3.19	2.01	Male
May	2.92	1.84	Male
May	2.19	1.05	Male
May	3.17	2.18	Male
May	3.27	2	Male
May	4.31	3.01	Male
May	3.19	2.84	Male
May	3.77	2.21	Male
May	4.84	3.43	Male
May	6.1	5.58	Male
May	5.73	4.1	Male
May	4.12	3.78	Male
May	4.05	3.01	Male
May	5.67	4.33	Male
May	5.9	4.18	Male
May	3.93	2.15	Male
May	5.19	4.21	Male
May	5.26	3.87	Male
May	5.84	4.18	Male
May	5.59	4.01	Male
May	3.93	2.22	Male
May	3.03	2.01	Male
May	6.66	4.99	Male
May	4.64	3.65	Male
May	3.77	2.19	Male
May	2.88	1.21	Male
May	5.24	3.11	Male
May	4.41	3.1	Male
May	3.92	2.24	Male
May	3.87	2.11	Male
May	3.19	2	Male
May	3.13	1.98	Male
May	3.24	1.78	Male
May	3.46	3	Male
May	2.9	1.31	Male
May	2.66	1.15	Male
May	3.41	2.14	Male
May	3.23	2.36	Male
May	3.63	2	Male
May	3.32	1.86	Male
May	3.13	2.1	Male
May	2.95	1.01	Male
May	2.04	1.15	Male
May	2.41	1.33	Male
May	2.07	1.81	Male
May	2.77	1.58	Male
May	2.32	1.78	Male
May	1.5	1.01	Male
May	1.81	1.06	Male
May	1.91	1.12	Male
May	2.46	1.13	Male
May	2.38	1.19	Male
May	3.39	2.24	Male
May	4.79	3.26	Male
May	5.65	4.87	Male
May	5.09	4	Male
May	4.88	3.01	Male
May	4.19	3.08	Male
May	1.55	1.01	Male
May	1.2	1	Male
June	2.92	1.84	Male
June	2.19	1.05	Male
June	4.05	3.01	Male
June	5.67	4.33	Male
June	5.26	3.87	Male
June	6.66	4.99	Male
June	4.64	3.65	Male
June	3.32	1.86	Male
June	3.13	2.1	Male
June	2.38	1.19	Male
June	3.39	2.24	Male
June	3.77	2.21	Male
June	4.84	3.43	Male
June	3.2	2.08	Male
June	3.19	2.01	Male
June	3.24	1.78	Male
June	3.46	3	Male
June	5.09	4	Male
June	4.88	3.01	Male
June	2.32	1.78	Male
June	1.5	1.01	Male
June	1.81	1.06	Male
June	5.9	4.18	Male
June	3.77	2.19	Male
June	3.87	2.11	Male
June	3.13	1.98	Male
June	2.41	1.33	Male
June	2.07	1.81	Male
June	2.77	1.58	Male
June	3.23	2.36	Male
June	3.63	2	Male
June	5.84	4.18	Male
June	2.9	1.31	Male
June	2.95	1.01	Male
June	5.59	4.01	Male
June	3.93	2.22	Male
June	3.03	2.01	Male
June	5.47	4.3	Male
June	3.93	2.21	Male
June	6.3	5.2	Male
June	1.91	1.12	Male
June	2.46	1.13	Male
June	2.88	1.21	Male
June	5.24	3.11	Male
June	4.41	3.1	Male
June	3.17	2.18	Male
June	3.27	2	Male
June	4.31	3.01	Male
June	3.19	2.84	Male
June	6.1	5.58	Male
June	5.73	4.1	Male
June	4.19	3.08	Male
June	1.55	1.01	Male
June	1.2	1	Male
June	4.12	3.78	Male
June	4.79	3.26	Male
June	5.65	4.87	Male
June	3.93	2.15	Male
June	5.19	4.21	Male
July	2.15	1.56	Male
July	2.42	1.16	Male
July	3.6	3.07	Male
July	3.79	3.46	Male
July	2.73	2.54	Male
July	3.15	2.67	Male
July	3.51	2.92	Male
July	2.53	2.04	Male
July	2.55	2.25	Male
July	3.33	2.62	Male
July	2.38	1.19	Male
July	3.67	2.98	Male
July	2.79	2.13	Male
July	2.95	2.64	Male
July	2.76	2.51	Male
July	3.32	2.99	Male
July	2.78	2.11	Male
July	2.28	1.98	Male
July	2.33	1.86	Male
July	2.89	2.02	Male
July	2.77	2.2	Male
July	2.82	2.44	Male
July	2.91	2.15	Male
July	2.36	2.01	Male
August	4.77	4.29	Non-ovigerous female
August	4.72	3.58	Non-ovigerous female
August	3.5	3.14	Non-ovigerous female
August	3.63	2.97	Non-ovigerous female
August	3.77	3.51	Non-ovigerous female
August	3.88	3.68	Non-ovigerous female
August	4.12	3.14	Non-ovigerous female
August	4.54	3.96	Non-ovigerous female
August	3.46	3.12	Non-ovigerous female
August	3.59	2.72	Non-ovigerous female
August	4.02	3.14	Non-ovigerous female
August	3.98	3.23	Non-ovigerous female
August	4.24	2.9	Non-ovigerous female
August	4.83	3.72	Non-ovigerous female
August	4.16	3.08	Non-ovigerous female
August	3.65	3.24	Non-ovigerous female
August	3.45	3.52	Non-ovigerous female
August	3.58	2.87	Non-ovigerous female
August	4.14	3.52	Non-ovigerous female
August	3.54	3.2	Non-ovigerous female
August	4.06	3.44	Non-ovigerous female
August	4.74	3.98	Non-ovigerous female
August	3.95	3.28	Non-ovigerous female
August	3.72	3.05	Non-ovigerous female
August	4.12	3.53	Non-ovigerous female
August	3.31	2.61	Non-ovigerous female
August	3.94	3.06	Non-ovigerous female
August	3.55	3.19	Non-ovigerous female
August	3.46	3.16	Non-ovigerous female
August	4.02	3.18	Non-ovigerous female
August	3.4	2.9	Non-ovigerous female
August	3.84	3.01	Non-ovigerous female
August	4.05	3.17	Non-ovigerous female
August	3.83	2.97	Non-ovigerous female
August	4.19	3.35	Non-ovigerous female
August	3.72	3.25	Non-ovigerous female
August	4.38	3.91	Non-ovigerous female
August	4.17	3.49	Non-ovigerous female
August	3.74	2.67	Non-ovigerous female
September	4.69	3.7	Non-ovigerous female
September	4.06	3.21	Non-ovigerous female
September	4.55	3.66	Non-ovigerous female
September	4.46	3.85	Non-ovigerous female
September	4.22	3.59	Non-ovigerous female
September	3.94	3.18	Non-ovigerous female
September	4.87	3.9	Non-ovigerous female
September	3.89	3.31	Non-ovigerous female
September	4.59	3.61	Non-ovigerous female
September	4.89	3.48	Non-ovigerous female
September	4.29	3.45	Non-ovigerous female
September	3.89	3.08	Non-ovigerous female
September	4.88	3.96	Non-ovigerous female
September	3.96	2.91	Non-ovigerous female
September	3.85	3.16	Non-ovigerous female
September	4.33	3.35	Non-ovigerous female
September	4.2	3.17	Non-ovigerous female
September	4.46	3.4	Non-ovigerous female
September	4.2	3.2	Non-ovigerous female
September	3.89	2.91	Non-ovigerous female
October	4.28	3.35	Non-ovigerous female
October	4.33	3.27	Non-ovigerous female
October	4.1	3.38	Non-ovigerous female
October	3.55	2.96	Non-ovigerous female
October	4.17	3.36	Non-ovigerous female
October	4.55	3.5	Non-ovigerous female
October	3.83	2.94	Non-ovigerous female
October	4.3	4.19	Non-ovigerous female
October	4.15	3.27	Non-ovigerous female
October	3.82	2.94	Non-ovigerous female
October	4.68	3.36	Non-ovigerous female
October	3.96	3.27	Non-ovigerous female
October	3.56	3.09	Non-ovigerous female
October	2.44	1.92	Non-ovigerous female
October	3.65	3.11	Non-ovigerous female
October	3.57	2.06	Non-ovigerous female
October	4.08	3.67	Non-ovigerous female
October	4.19	3.69	Non-ovigerous female
October	3.5	3.29	Non-ovigerous female
October	5.31	4.28	Non-ovigerous female
October	5.25	4.32	Non-ovigerous female
October	4.34	3.61	Non-ovigerous female
October	3.97	3.33	Non-ovigerous female
October	4.39	3.37	Non-ovigerous female
October	3.27	2.72	Non-ovigerous female
October	2.42	1.92	Non-ovigerous female
October	4.39	3.55	Non-ovigerous female
October	4.17	3.91	Non-ovigerous female
October	4.38	3.75	Non-ovigerous female
October	3.54	3.27	Non-ovigerous female
October	5.18	4.02	Non-ovigerous female
October	4.28	3.62	Non-ovigerous female
October	3.81	3.19	Non-ovigerous female
October	5.88	4.28	Non-ovigerous female
October	5.29	4.24	Non-ovigerous female
October	5.04	4.81	Non-ovigerous female
October	4.37	3.71	Non-ovigerous female
October	3.35	2.93	Non-ovigerous female
October	3.74	3.2	Non-ovigerous female
October	3.32	2.82	Non-ovigerous female
October	5.33	4.44	Non-ovigerous female
October	3.77	3.28	Non-ovigerous female
October	3.64	2.98	Non-ovigerous female
October	3.44	2.55	Non-ovigerous female
October	3.28	3.08	Non-ovigerous female
November	4.04	3.11	Non-ovigerous female
November	4.98	3.66	Non-ovigerous female
November	2	1.8	Non-ovigerous female
November	4.69	3.47	Non-ovigerous female
November	5.51	4.37	Non-ovigerous female
November	3.46	3.06	Non-ovigerous female
November	3.52	2.9	Non-ovigerous female
November	5.16	4.02	Non-ovigerous female
November	4.76	3.55	Non-ovigerous female
November	3.49	3.22	Non-ovigerous female
November	3.33	3.02	Non-ovigerous female
November	4.19	3.68	Non-ovigerous female
November	4.91	4.12	Non-ovigerous female
November	4.24	3.65	Non-ovigerous female
November	2.41	2.2	Non-ovigerous female
November	4.73	3.49	Non-ovigerous female
November	6.46	5.42	Non-ovigerous female
November	4.88	3.64	Non-ovigerous female
November	3.56	3.03	Non-ovigerous female
November	3.86	3.35	Non-ovigerous female
November	5.17	4.48	Non-ovigerous female
November	5.08	4.04	Non-ovigerous female
November	2.37	2.1	Non-ovigerous female
November	2.26	1.83	Non-ovigerous female
November	3.03	2.5	Non-ovigerous female
November	4.26	2.39	Non-ovigerous female
November	3.16	2.77	Non-ovigerous female
November	4.15	3.34	Non-ovigerous female
November	4.91	4.14	Non-ovigerous female
November	5.38	4.18	Non-ovigerous female
November	3.19	2.53	Non-ovigerous female
November	2.88	2.42	Non-ovigerous female
November	4.9	3.73	Non-ovigerous female
November	3.64	3.01	Non-ovigerous female
November	3.04	2.3	Non-ovigerous female
November	2.12	1.18	Non-ovigerous female
November	1.94	1.62	Non-ovigerous female
November	4.85	3.8	Non-ovigerous female
November	4.88	3.91	Non-ovigerous female
November	2.45	2.04	Non-ovigerous female
December	4.93	4.23	Non-ovigerous female
December	5.98	4.78	Non-ovigerous female
December	5.25	3.94	Non-ovigerous female
December	2.43	2.1	Non-ovigerous female
December	4.11	3.09	Non-ovigerous female
December	3.25	2.7	Non-ovigerous female
December	4.04	3.19	Non-ovigerous female
December	3.29	2.58	Non-ovigerous female
December	2.78	2.23	Non-ovigerous female
December	3.52	3	Non-ovigerous female
December	4.27	3.33	Non-ovigerous female
December	3.86	2.98	Non-ovigerous female
December	3.52	3.05	Non-ovigerous female
December	2.94	2.7	Non-ovigerous female
December	3.09	2.68	Non-ovigerous female
December	3.39	2.88	Non-ovigerous female
December	3.73	3.02	Non-ovigerous female
December	2.19	1.8	Non-ovigerous female
December	2.73	2.17	Non-ovigerous female
December	2.98	2.34	Non-ovigerous female
December	3	2.69	Non-ovigerous female
December	3.6	2.71	Non-ovigerous female
December	2.6	2.46	Non-ovigerous female
December	3.8	3.32	Non-ovigerous female
December	3.05	2.46	Non-ovigerous female
December	2.36	2.22	Non-ovigerous female
December	3	2.5	Non-ovigerous female
December	3.55	2.75	Non-ovigerous female
December	3.68	2.59	Non-ovigerous female
December	3.96	2.87	Non-ovigerous female
December	3.18	2.7	Non-ovigerous female
December	3.95	3.42	Non-ovigerous female
December	2.99	2.39	Non-ovigerous female
December	2.34	1.93	Non-ovigerous female
December	3.27	2.55	Non-ovigerous female
December	3.18	2.64	Non-ovigerous female
December	3.15	2.44	Non-ovigerous female
December	3.33	2.68	Non-ovigerous female
December	3.53	2.59	Non-ovigerous female
December	3.15	2.7	Non-ovigerous female
December	2.88	2.64	Non-ovigerous female
December	3.19	2.43	Non-ovigerous female
December	3.8	3.41	Non-ovigerous female
December	2.57	2.21	Non-ovigerous female
December	2.98	2.23	Non-ovigerous female
December	2.76	2.33	Non-ovigerous female
December	3.02	2.29	Non-ovigerous female
December	3.08	2.46	Non-ovigerous female
December	3.81	2.7	Non-ovigerous female
December	3.44	2.37	Non-ovigerous female
December	2.75	2.09	Non-ovigerous female
December	3.04	2.58	Non-ovigerous female
December	3.05	2.6	Non-ovigerous female
December	2.58	2.24	Non-ovigerous female
December	2.56	2.14	Non-ovigerous female
December	4.4	3.55	Non-ovigerous female
December	2.08	1.85	Non-ovigerous female
January	3.32	2.41	Non-ovigerous female
January	3.06	2.25	Non-ovigerous female
January	3.44	2.34	Non-ovigerous female
January	4.29	3.98	Non-ovigerous female
January	4.01	3.02	Non-ovigerous female
January	3.93	3.1	Non-ovigerous female
January	4.43	3.44	Non-ovigerous female
January	3.06	2.65	Non-ovigerous female
January	3.28	2.73	Non-ovigerous female
January	4.03	2.9	Non-ovigerous female
January	1.98	1.58	Non-ovigerous female
January	2.85	2.37	Non-ovigerous female
January	3.71	3.03	Non-ovigerous female
January	5.05	4.02	Non-ovigerous female
January	6.03	4.76	Non-ovigerous female
January	5.49	4.54	Non-ovigerous female
January	3.49	2.41	Non-ovigerous female
January	3.52	2.69	Non-ovigerous female
January	5.29	4.1	Non-ovigerous female
January	3.52	2.8	Non-ovigerous female
January	3.75	2.95	Non-ovigerous female
January	4.01	3.16	Non-ovigerous female
January	3.62	3.12	Non-ovigerous female
January	6	4.78	Non-ovigerous female
January	3.75	3.12	Non-ovigerous female
January	3.18	2.47	Non-ovigerous female
January	3.95	3.1	Non-ovigerous female
January	3.32	2.93	Non-ovigerous female
January	3	2.3	Non-ovigerous female
January	2.78	2.28	Non-ovigerous female
January	3.72	2.89	Non-ovigerous female
January	3.78	3.17	Non-ovigerous female
January	3.29	2.5	Non-ovigerous female
January	3.89	3.22	Non-ovigerous female
January	4.82	3.6	Non-ovigerous female
January	3.42	2.91	Non-ovigerous female
January	3.78	3.16	Non-ovigerous female
January	4.15	3.15	Non-ovigerous female
January	3.95	2.71	Non-ovigerous female
January	4.9	3.92	Non-ovigerous female
January	3.36	2.9	Non-ovigerous female
January	3.74	3.34	Non-ovigerous female
January	4.65	3.77	Non-ovigerous female
January	3.63	2.74	Non-ovigerous female
January	5.47	4.43	Non-ovigerous female
January	1.37	1.08	Non-ovigerous female
January	3.19	2.1	Non-ovigerous female
January	3.1	1.95	Non-ovigerous female
January	1.28	1.01	Non-ovigerous female
January	3.33	2.04	Non-ovigerous female
January	2.51	1.91	Non-ovigerous female
January	3.06	2.19	Non-ovigerous female
January	3.55	2	Non-ovigerous female
February	2.64	2.07	Non-ovigerous female
February	4.2	2.65	Non-ovigerous female
February	4.36	3.3	Non-ovigerous female
February	4.34	3.36	Non-ovigerous female
February	3.43	2.62	Non-ovigerous female
February	4.51	3.43	Non-ovigerous female
February	6.11	4.84	Non-ovigerous female
February	2.92	2.38	Non-ovigerous female
February	3.7	3.19	Non-ovigerous female
February	3.22	2.23	Non-ovigerous female
February	2.68	2.18	Non-ovigerous female
February	2.35	1.91	Non-ovigerous female
February	4.13	3.2	Non-ovigerous female
February	3.37	2.92	Non-ovigerous female
February	5.33	4.47	Non-ovigerous female
February	3.75	3.26	Non-ovigerous female
February	3.71	3.02	Non-ovigerous female
February	4.17	3.62	Non-ovigerous female
February	3	2.21	Non-ovigerous female
February	5.2	3.88	Non-ovigerous female
February	3.08	2.57	Non-ovigerous female
February	3.9	3.28	Non-ovigerous female
February	4.39	3.32	Non-ovigerous female
February	3.81	2.9	Non-ovigerous female
February	2.78	2.36	Non-ovigerous female
February	2.78	2.53	Non-ovigerous female
February	3.46	3	Non-ovigerous female
February	3.42	2.91	Non-ovigerous female
February	3.71	2.92	Non-ovigerous female
February	3.02	2.21	Non-ovigerous female
February	2.66	2.2	Non-ovigerous female
March	5.64	4.03	Non-ovigerous female
March	4.65	3.45	Non-ovigerous female
March	4.46	3.36	Non-ovigerous female
March	5.59	4.68	Non-ovigerous female
March	4.2	3.3	Non-ovigerous female
March	4.1	4.9	Non-ovigerous female
March	4.2	3.29	Non-ovigerous female
March	3.29	2.29	Non-ovigerous female
March	4.62	3.44	Non-ovigerous female
March	3.29	2.54	Non-ovigerous female
March	3.41	2.93	Non-ovigerous female
March	3.6	2.67	Non-ovigerous female
March	4.24	3.6	Non-ovigerous female
March	4.73	3.43	Non-ovigerous female
March	4.54	3.25	Non-ovigerous female
March	4.13	3.37	Non-ovigerous female
March	3.62	2.47	Non-ovigerous female
March	4.46	3.46	Non-ovigerous female
March	4.12	3.74	Non-ovigerous female
March	4.21	3.17	Non-ovigerous female
March	4.6	3.65	Non-ovigerous female
March	4.37	3.58	Non-ovigerous female
March	4.2	3.55	Non-ovigerous female
March	4.53	3.13	Non-ovigerous female
March	4.16	3.32	Non-ovigerous female
March	4.99	3.28	Non-ovigerous female
March	3.23	2.59	Non-ovigerous female
March	4.31	3.67	Non-ovigerous female
March	3.74	3.9	Non-ovigerous female
March	3.2	2.5	Non-ovigerous female
March	3.61	2.6	Non-ovigerous female
March	3.81	2.8	Non-ovigerous female
March	3.74	3.05	Non-ovigerous female
March	4.71	3.61	Non-ovigerous female
March	3.9	3.03	Non-ovigerous female
March	3.56	2.81	Non-ovigerous female
March	3.66	3	Non-ovigerous female
March	5.56	4.01	Non-ovigerous female
March	2.69	2.1	Non-ovigerous female
March	2.54	2.34	Non-ovigerous female
March	2.9	2.41	Non-ovigerous female
March	3.73	2.99	Non-ovigerous female
March	3.67	3	Non-ovigerous female
March	3.58	2.79	Non-ovigerous female
March	3.83	3	Non-ovigerous female
March	3.56	2.7	Non-ovigerous female
March	3.37	2.54	Non-ovigerous female
March	3.88	2.54	Non-ovigerous female
March	3.81	3.45	Non-ovigerous female
March	2.29	2	Non-ovigerous female
March	2.64	2.01	Non-ovigerous female
March	3.55	2.63	Non-ovigerous female
March	3.49	2.67	Non-ovigerous female
March	3.01	2.98	Non-ovigerous female
March	3.38	3.28	Non-ovigerous female
March	2.63	1.57	Non-ovigerous female
March	2.75	1.74	Non-ovigerous female
March	3.74	2.5	Non-ovigerous female
March	2.57	1.6	Non-ovigerous female
March	2.35	1.59	Non-ovigerous female
April	3.75	2.88	Non-ovigerous female
April	4.04	3.18	Non-ovigerous female
April	4.49	3.33	Non-ovigerous female
April	4.63	3.7	Non-ovigerous female
April	3.98	3.23	Non-ovigerous female
April	4.84	3.42	Non-ovigerous female
April	3.44	2.83	Non-ovigerous female
April	3.4	2.44	Non-ovigerous female
April	3.7	3.03	Non-ovigerous female
April	5.06	4.07	Non-ovigerous female
April	4.42	3.28	Non-ovigerous female
April	4.57	3.74	Non-ovigerous female
April	3.7	2.99	Non-ovigerous female
April	4.04	3.23	Non-ovigerous female
April	4.33	3.49	Non-ovigerous female
April	1.88	1.83	Non-ovigerous female
April	3.52	2.69	Non-ovigerous female
April	4.05	3.2	Non-ovigerous female
April	3.11	2.27	Non-ovigerous female
April	3.67	3.03	Non-ovigerous female
April	3.71	2.68	Non-ovigerous female
April	3.96	3.8	Non-ovigerous female
April	3.63	2.77	Non-ovigerous female
April	4.1	2.94	Non-ovigerous female
April	3.33	2.76	Non-ovigerous female
April	4.03	3.06	Non-ovigerous female
April	4.11	3.02	Non-ovigerous female
April	3.77	2.95	Non-ovigerous female
April	4.05	3.25	Non-ovigerous female
April	4.01	2.68	Non-ovigerous female
April	3.73	2.81	Non-ovigerous female
April	3.47	2.87	Non-ovigerous female
April	3.42	2.78	Non-ovigerous female
April	4.38	3.37	Non-ovigerous female
April	3.4	2.64	Non-ovigerous female
April	2.41	2.8	Non-ovigerous female
April	4.43	3.52	Non-ovigerous female
April	3.03	2.49	Non-ovigerous female
April	3.52	2.23	Non-ovigerous female
April	4.41	3.25	Non-ovigerous female
April	3.92	3.16	Non-ovigerous female
April	3.87	2.77	Non-ovigerous female
April	3.58	2.71	Non-ovigerous female
April	3.85	2.82	Non-ovigerous female
April	3.28	2.62	Non-ovigerous female
April	3.81	2.67	Non-ovigerous female
April	3.91	2.9	Non-ovigerous female
April	3.4	2.21	Non-ovigerous female
April	3.41	2.83	Non-ovigerous female
April	3.45	2.49	Non-ovigerous female
April	2.89	2.51	Non-ovigerous female
April	2.6	2.05	Non-ovigerous female
April	3.4	2.81	Non-ovigerous female
April	3.32	2.29	Non-ovigerous female
April	3.36	2.9	Non-ovigerous female
April	3.23	2.74	Non-ovigerous female
April	3.13	2.64	Non-ovigerous female
April	3.35	2.6	Non-ovigerous female
April	3.23	2.41	Non-ovigerous female
April	2.81	2.07	Non-ovigerous female
April	2.5	1.77	Non-ovigerous female
April	3.07	2.23	Non-ovigerous female
April	3.18	2.27	Non-ovigerous female
April	1.8	1.42	Non-ovigerous female
April	1.5	1.67	Non-ovigerous female
April	1.55	1.57	Non-ovigerous female
April	1.97	1.74	Non-ovigerous female
April	1.9	1.56	Non-ovigerous female
April	1.77	1.33	Non-ovigerous female
May	1.99	1.21	Non-ovigerous female
May	1.65	1	Non-ovigerous female
May	1.34	1.02	Non-ovigerous female
May	2.61	1.35	Non-ovigerous female
May	1.99	1.07	Non-ovigerous female
May	2.09	1.13	Non-ovigerous female
May	2.77	1.73	Non-ovigerous female
May	2.82	1.09	Non-ovigerous female
May	2.32	1.34	Non-ovigerous female
May	3.61	2.22	Non-ovigerous female
May	5.16	4.1	Non-ovigerous female
May	6.12	5.01	Non-ovigerous female
May	5.04	3.98	Non-ovigerous female
May	4.26	2.1	Non-ovigerous female
May	6.04	5.11	Non-ovigerous female
May	4.87	3.21	Non-ovigerous female
May	5.04	3.89	Non-ovigerous female
May	5.77	4.44	Non-ovigerous female
May	5.01	3.31	Non-ovigerous female
May	5.53	3.96	Non-ovigerous female
May	6.66	4.98	Non-ovigerous female
May	6.23	5.09	Non-ovigerous female
May	4.13	3.31	Non-ovigerous female
May	3.61	2.21	Non-ovigerous female
May	2.76	1.19	Non-ovigerous female
May	2.88	1.13	Non-ovigerous female
May	1.75	1.07	Non-ovigerous female
May	1.98	1	Non-ovigerous female
May	3.41	2.13	Non-ovigerous female
May	3.4	2.98	Non-ovigerous female
May	5.06	4.19	Non-ovigerous female
May	3.71	3	Non-ovigerous female
May	4.34	3.5	Non-ovigerous female
May	1.89	1.04	Non-ovigerous female
May	3.12	2.08	Non-ovigerous female
May	3.68	2.44	Non-ovigerous female
May	3.72	2.08	Non-ovigerous female
May	3.64	2.24	Non-ovigerous female
May	4.11	3.01	Non-ovigerous female
May	3.34	2.21	Non-ovigerous female
May	4.19	3.73	Non-ovigerous female
May	4.09	3.23	Non-ovigerous female
May	4.03	3.01	Non-ovigerous female
May	3.73	2.08	Non-ovigerous female
May	3.47	2.24	Non-ovigerous female
May	3.42	2.18	Non-ovigerous female
May	2.7	1.2	Non-ovigerous female
May	2.41	1.19	Non-ovigerous female
May	1.99	1.13	Non-ovigerous female
May	1.49	1.04	Non-ovigerous female
May	1.51	1.02	Non-ovigerous female
May	3.52	2.1	Non-ovigerous female
May	2.49	1.91	Non-ovigerous female
May	3.03	2.89	Non-ovigerous female
May	1.91	1.01	Non-ovigerous female
May	1.14	1.1	Non-ovigerous female
June	4.87	3.21	Non-ovigerous female
June	5.04	3.89	Non-ovigerous female
June	2.32	1.34	Non-ovigerous female
June	3.61	2.22	Non-ovigerous female
June	5.77	4.44	Non-ovigerous female
June	5.01	3.31	Non-ovigerous female
June	2.76	1.19	Non-ovigerous female
June	2.88	1.13	Non-ovigerous female
June	1.75	1.07	Non-ovigerous female
June	1.99	1.07	Non-ovigerous female
June	2.09	1.13	Non-ovigerous female
June	2.77	1.73	Non-ovigerous female
June	2.82	1.09	Non-ovigerous female
June	4.09	3.23	Non-ovigerous female
June	4.03	3.01	Non-ovigerous female
June	1.99	1.21	Non-ovigerous female
June	1.65	1	Non-ovigerous female
June	1.34	1.02	Non-ovigerous female
June	2.61	1.35	Non-ovigerous female
June	3.34	2.21	Non-ovigerous female
June	4.19	3.73	Non-ovigerous female
June	3.73	2.08	Non-ovigerous female
June	3.47	2.24	Non-ovigerous female
June	5.16	4.1	Non-ovigerous female
June	6.12	5.01	Non-ovigerous female
June	5.04	3.98	Non-ovigerous female
June	4.26	2.1	Non-ovigerous female
June	6.04	5.11	Non-ovigerous female
June	5.53	3.96	Non-ovigerous female
June	6.66	4.98	Non-ovigerous female
June	6.23	5.09	Non-ovigerous female
June	4.13	3.31	Non-ovigerous female
June	3.61	2.21	Non-ovigerous female
June	3.64	2.24	Non-ovigerous female
June	4.11	3.01	Non-ovigerous female
June	1.98	1	Non-ovigerous female
June	3.41	2.13	Non-ovigerous female
June	3.4	2.98	Non-ovigerous female
June	4.34	3.5	Non-ovigerous female
June	1.89	1.04	Non-ovigerous female
July	2.5	2.05	Non-ovigerous female
July	3.4	2.88	Non-ovigerous female
July	2.68	2.39	Non-ovigerous female
July	2.91	2.65	Non-ovigerous female
July	3.63	2.9	Non-ovigerous female
July	4.53	3.81	Non-ovigerous female
July	4.82	3.68	Non-ovigerous female
July	3.6	3.17	Non-ovigerous female
July	3.29	2.98	Non-ovigerous female
July	2.88	2.06	Non-ovigerous female
July	2.42	2	Non-ovigerous female
July	4.16	3.99	Non-ovigerous female
July	4.07	3.02	Non-ovigerous female
July	3.97	3.17	Non-ovigerous female
July	3.81	2.88	Non-ovigerous female
July	2.87	2.15	Non-ovigerous female
July	4.4	3.73	Non-ovigerous female
July	3.22	2.63	Non-ovigerous female
July	3.54	3.11	Non-ovigerous female
July	4.18	3.73	Non-ovigerous female
July	3.44	2.64	Non-ovigerous female
July	3.81	3.05	Non-ovigerous female
July	3.29	2.96	Non-ovigerous female
July	4.46	3.8	Non-ovigerous female
July	4.83	3.81	Non-ovigerous female
July	3.54	2.29	Non-ovigerous female
July	3.38	2.22	Non-ovigerous female
July	3.32	2.18	Non-ovigerous female
July	4.02	3.41	Non-ovigerous female
July	3.99	2.52	Non-ovigerous female
July	4.15	3.64	Non-ovigerous female
July	4.67	4.04	Non-ovigerous female
July	2.96	2.01	Non-ovigerous female
July	3.13	2.39	Non-ovigerous female
July	3.72	3.2	Non-ovigerous female
July	3.67	2.74	Non-ovigerous female
July	3.12	2.88	Non-ovigerous female
July	2.97	2.14	Non-ovigerous female
July	2.78	1.23	Non-ovigerous female
July	2.05	1.66	Non-ovigerous female
July	3.91	3.12	Non-ovigerous female
July	3.4	3.03	Non-ovigerous female
July	3.78	2.82	Non-ovigerous female
July	3.69	2.91	Non-ovigerous female
July	4.46	4.16	Non-ovigerous female
July	4.72	4.21	Non-ovigerous female
July	3.39	3.08	Non-ovigerous female
July	3.12	2.96	Non-ovigerous female
July	4.83	4.02	Non-ovigerous female
July	3.66	2.82	Non-ovigerous female
July	4.19	3.6	Non-ovigerous female
July	4.33	3.96	Non-ovigerous female
July	3.92	3.15	Non-ovigerous female
July	3.06	2.98	Non-ovigerous female
July	2.89	2.1	Non-ovigerous female
July	2.15	1.93	Non-ovigerous female
July	1.98	1.15	Non-ovigerous female
July	3.11	2.9	Non-ovigerous female
July	2.24	1.86	Non-ovigerous female
July	2.86	2.32	Non-ovigerous female
July	2.99	2.13	Non-ovigerous female
August	5.52	4.25	Ovigerous female
August	5	4.24	Ovigerous female
August	4.73	2.47	Ovigerous female
August	4	3.36	Ovigerous female
August	4.3	3.43	Ovigerous female
August	3.9	3.02	Ovigerous female
August	3.59	2.96	Ovigerous female
August	3.45	3.08229	Ovigerous female
August	4.49	3.36	Ovigerous female
August	4.55	3.45	Ovigerous female
August	5.09	4.14	Ovigerous female
August	4.45	4.05	Ovigerous female
August	4.49	3.32	Ovigerous female
August	3.83	2.85	Ovigerous female
August	4.02	3.18	Ovigerous female
August	4.5	3.81	Ovigerous female
August	4.17	3.61	Ovigerous female
August	4.03	3.12	Ovigerous female
August	4.1	3.34	Ovigerous female
August	4.56	3.14	Ovigerous female
August	3.81	3.08	Ovigerous female
August	3.76	3.08	Ovigerous female
August	3.73	2.9	Ovigerous female
August	3.88	3.31	Ovigerous female
August	3.83	3.23	Ovigerous female
August	3.78	2.9	Ovigerous female
August	3.69	3.17	Ovigerous female
August	4.06	3.23	Ovigerous female
August	3.84	3.04	Ovigerous female
August	3.54	3.05	Ovigerous female
August	3.95	3.22	Ovigerous female
August	3.67	3.02	Ovigerous female
August	3.83	2.87	Ovigerous female
August	4.09	3.19	Ovigerous female
August	3.64	3.39	Ovigerous female
August	3.68	2.78	Ovigerous female
August	3.64	3.01	Ovigerous female
August	4.05	3.21	Ovigerous female
August	3.5	2.74	Ovigerous female
August	4.86	4.14	Ovigerous female
August	3.47	2.61	Ovigerous female
August	4.08	3.43	Ovigerous female
August	3.53	3.04	Ovigerous female
August	4.02	3.4	Ovigerous female
August	3.85	3.36	Ovigerous female
August	3.65	3	Ovigerous female
August	3.68	3.44	Ovigerous female
August	3.9	3.59	Ovigerous female
August	3.58	2.84	Ovigerous female
August	5.17	3.74	Ovigerous female
September	5.36	4.35	Ovigerous female
September	4.62	3.68	Ovigerous female
September	3.92	3.2	Ovigerous female
September	5.15	4.08	Ovigerous female
September	4.82	3.58	Ovigerous female
September	4.62	3.8	Ovigerous female
September	4.48	3.56	Ovigerous female
September	4.14	3.42	Ovigerous female
September	4.05	3.22	Ovigerous female
September	4.08	3.32	Ovigerous female
September	3.75	2.91	Ovigerous female
September	3.99	3.05	Ovigerous female
September	4.02	3.34	Ovigerous female
September	4.13	3.13	Ovigerous female
September	3.46	2.74	Ovigerous female
September	3.79	3.15	Ovigerous female
September	4.45	3.45	Ovigerous female
September	4.48	3.71	Ovigerous female
September	3.94	3.05	Ovigerous female
September	4.33	3.53	Ovigerous female
September	4.18	3.51	Ovigerous female
September	4.02	3.28	Ovigerous female
September	3.73	3.06	Ovigerous female
September	3.78	2.98	Ovigerous female
September	4.41	3.39	Ovigerous female
September	4.89	4.03	Ovigerous female
September	4.12	3.38	Ovigerous female
September	4.51	3.44	Ovigerous female
September	4.45	3.34	Ovigerous female
September	4.99	3.7	Ovigerous female
September	5.1	3.83	Ovigerous female
September	4.62	3.38	Ovigerous female
September	3.67	2.86	Ovigerous female
September	3.8	3.31	Ovigerous female
September	4.16	3.18	Ovigerous female
September	4.19	3.24	Ovigerous female
September	4.25	3.54	Ovigerous female
September	4.43	3.76	Ovigerous female
September	3.96	3.1	Ovigerous female
September	4.48	3.22	Ovigerous female
September	4.16	3.32	Ovigerous female
September	4.1	3.16	Ovigerous female
September	4.64	3.64	Ovigerous female
September	3.95	3.04	Ovigerous female
September	4.38	3.5	Ovigerous female
September	4.56	3.58	Ovigerous female
September	3.81	3.06	Ovigerous female
September	4.36	3.38	Ovigerous female
September	4.02	3.4	Ovigerous female
September	4.82	3.51	Ovigerous female
September	3.88	3.23	Ovigerous female
September	3.99	3.4	Ovigerous female
September	4.21	3.26	Ovigerous female
September	4.02	3.11	Ovigerous female
September	3.72	3.03	Ovigerous female
September	4.8	3.96	Ovigerous female
September	3.48	3.17563	Ovigerous female
October	4.35	4.02	Ovigerous female
October	3.51	3.17	Ovigerous female
October	3.88	3.49	Ovigerous female
October	3.67	3.4926	Ovigerous female
October	3.79	3.15	Ovigerous female
October	3.47	3.31	Ovigerous female
October	3.88	3.67951	Ovigerous female
October	5.4	4.41	Ovigerous female
October	4.48	3.76	Ovigerous female
October	3.47	2.85	Ovigerous female
October	3.93	3.21	Ovigerous female
October	3.98	3.61242	Ovigerous female
October	3.53	3.12	Ovigerous female
October	3.67	3.34	Ovigerous female
October	3.99	3.35	Ovigerous female
October	3.52	3.31	Ovigerous female
October	3.61	3.39	Ovigerous female
October	3.95	3.32	Ovigerous female
October	4	3.44	Ovigerous female
October	4.3	3.51	Ovigerous female
October	4.42	3.45	Ovigerous female
October	3.61	3.34534	Ovigerous female
October	3.51	3.11243	Ovigerous female
October	4	3.38	Ovigerous female
November	5.6	4.58	Ovigerous female
November	5.42	4.03	Ovigerous female
November	4.92	3.74	Ovigerous female
November	5.11	4.13	Ovigerous female
November	4.99	2.89	Ovigerous female
November	5.01	4	Ovigerous female
November	5.18	4.02	Ovigerous female
November	5.24	4.31	Ovigerous female
November	4.03	3.91	Ovigerous female
November	4.11	3.1	Ovigerous female
November	4.23	3.21	Ovigerous female
November	3.99	2.05	Ovigerous female
November	4	3.35	Ovigerous female
December	4.76	3.7	Ovigerous female
December	4.49	3.78	Ovigerous female
December	4.51	3.84	Ovigerous female
December	4.75	3.77	Ovigerous female
December	4.52	4	Ovigerous female
December	4.66	3.11	Ovigerous female
December	4.31	3.09	Ovigerous female
December	4.19	2.01	Ovigerous female
December	4.2	2.98	Ovigerous female
December	3.98	2.19	Ovigerous female
December	3.95	2.22	Ovigerous female
December	4.15	3.1	Ovigerous female
December	4.94	3.21	Ovigerous female
December	4	3.01	Ovigerous female
December	4.05	3.71	Ovigerous female
January	3.98	3.39	Ovigerous female
January	3.81	3.07	Ovigerous female
January	3.57	2.92	Ovigerous female
January	3.82	3.07	Ovigerous female
January	3.78	3.05	Ovigerous female
January	3.58	2.75785	Ovigerous female
January	4.63	3.6	Ovigerous female
January	3.55	2.92	Ovigerous female
January	3.78	3.09	Ovigerous female
January	3.65	3.08	Ovigerous female
January	3.56	3.20621	Ovigerous female
January	4.09	3.34	Ovigerous female
January	3.91	3.14	Ovigerous female
January	3.97	3.26	Ovigerous female
January	4.29	3.34	Ovigerous female
January	3.62	2.84	Ovigerous female
February	3.8	3.09	Ovigerous female
February	3.87	3.38	Ovigerous female
February	3.66	2.99	Ovigerous female
February	3.58	3.12	Ovigerous female
February	3.75	2.53571	Ovigerous female
February	3.89	2.50157	Ovigerous female
February	4.4	2.95208	Ovigerous female
February	4.23	2.65766	Ovigerous female
February	3.51	2.14	Ovigerous female
March	3.5	2.84	Ovigerous female
March	3.49	3.01	Ovigerous female
March	3.61	3.14	Ovigerous female
March	5.16	3.93	Ovigerous female
March	3.64	2.98	Ovigerous female
March	4	3.19	Ovigerous female
March	3.61	2.98	Ovigerous female
March	3.78	2.76	Ovigerous female
March	3.85	2.81	Ovigerous female
March	4.01	3.26	Ovigerous female
April	3.48	2.88	Ovigerous female
April	3.98	4.05654	Ovigerous female
April	3.69	2.4484	Ovigerous female
April	4.21	3.21941	Ovigerous female
April	4.56	3.71556	Ovigerous female
April	4.24	3.10429	Ovigerous female
April	4.31	3.03942	Ovigerous female
April	3.91	3.18	Ovigerous female
May	5.1	4.41	Ovigerous female
May	4.38	2.801	Ovigerous female			Months	Ambient Temp	Water Temp
May	4.64	3.01	Ovigerous female			January	28.1	27.6
May	4.11	2.91	Ovigerous female			February	28.2	27.6
May	3.48	2.8	Ovigerous female			March	32.3	29.5
May	4.04	3.91	Ovigerous female			April	34.3	33.1
May	4.56	4.17404	Ovigerous female			May	33.5	32.2
May	4.51	3.16	Ovigerous female			June	33.3	31.8
May	3.47	2.9295	Ovigerous female			July	30.5	30.1
May	3.69	3.21494	Ovigerous female			August	28.9	27.8
June	5.3	4.7	Ovigerous female			September	29.3	28.6
June	3.61	2.36906	Ovigerous female			October	28.8	28.3
June	4.5	2.9	Ovigerous female			November	27.7	27.3
June	3.99	2.8	Ovigerous female			December	27.2	26.8
June	3.64	2.86788	Ovigerous female
June	4	3.8	Ovigerous female
July	3.68	2.31917	Ovigerous female
July	3.7	3.27308	Ovigerous female
July	3.27	2.6181	Ovigerous female

## Sheet: Fecundity data
Month	Carapace width	Carapace length	Crab wet body weight with egg mass	Crab wet body weight	Egg mass weight	Total number of eggs	Egg Size					Average size of eggs
August	5.52	4.25	0.11	0.09	0.02	624	0.16	0.13	0.25	0.19	0.23	0.192
August	5	4.24	0.07	0.05	0.02	565	0.26	0.19	0.2	0.27	0.22	0.228
August	4.73	2.47	0.06	0.03	0.03	543	0.14	0.22	0.2	0.15	0.23	0.188
August	4	3.36	0.03	0.02	0.01	420	0.23	0.14	0.26	0.2	0.18	0.202
August	4.3	3.43	0.04	0.03	0.01	534	0.2	0.19	0.18	0.18	0.16	0.182
August	3.9	3.02	0.029	0.023	0.006	479	0.12	0.15	0.15	0.16	0.17	0.15
August	3.59	2.96	0.026	0.021	0.005	406	0.21	0.15	0.15	0.16	0.17	0.168
August	3.19	2.85	0.021	0.017	0.004	335	0.1	0.15	0.14	0.13	0.13	0.13
September	5.36	4.35	0.1	0.08	0.02	1382	0.28	0.25	0.29	0.28	0.24	0.268
September	4.62	3.68	0.06	0.03	0.03	800	0.11	0.21	0.2	0.21	0.18	0.182
September	3.92	3.2	0.03	0.01	0.02	238	0.21	0.24	0.23	0.21	0.2	0.218
September	5.15	4.08	0.05	0.04	0.01	703	0.21	0.25	0.18	0.24	0.24	0.224
September	4.82	3.58	0.04	0.03	0.01	431	0.19	0.25	0.2	0.16	0.18	0.196
September	4.62	3.8	0.04	0.03	0.01	570	0.21	0.19	0.2	0.15	0.18	0.186
October	4.35	4.02	0.07	0.05	0.02	545	0.23	0.26	0.22	0.2	0.15	0.212
October	3.47	3.31	0.04	0.03	0.01	751	0.21	0.19	0.33	0.25	0.22	0.24
October	5.4	4.41	0.08	0.07	0.01	832	0.2	0.25	0.19	0.28	0.19	0.222
October	3.14	2.85	0.02	0.01	0.01	426	0.2	0.21	0.24	0.2	0.16	0.202
October	3.67	3.34	0.03	0.02	0.01	913	0.15	0.25	0.18	0.23	0.17	0.196
October	3.09	2.74	0.02	0.01	0.01	477	0.21	0.24	0.18	0.25	0.23	0.222
November	5.6	4.58	0.13	0.11	0.02	770	0.41	0.23	0.28	0.24	0.22	0.276
November	5.42	4.03	0.12	0.07	0.05	930	0.23	0.3	0.26	0.27	0.2	0.252
November	4.92	3.74	0.09	0.04	0.05	430	0.29	0.31	0.46	0.35	0.35	0.352
December	4.49	3.78	0.05	0.03	0.02	1100	0.26	0.24	0.25	0.24	0.24	0.246
December	4.51	3.84	0.04	0.03	0.01	560	0.26	0.29	0.23	0.24	0.24	0.252
December	4.75	3.77	0.05	0.04	0.01	1110	0.19	0.24	0.29	0.26	0.19	0.234
January	3.57	2.92	0.04	0.03	0.01	980	0.25	0.24	0.3	0.23	0.26	0.256
January	3.78	3.05	0.03	0.02	0.01	670	0.21	0.18	0.23	0.28	0.24	0.228
January	4.63	3.6	0.04	0.02	0.02	690	0.31	0.24	0.27	0.2	0.28	0.26
January	3.22	2.9	0.03	0.01	0.02	730	0.24	0.29	0.21	0.23	0.23	0.24
January	4.09	3.34	0.04	0.02	0.02	650	0.3	0.25	0.26	0.31	0.18	0.26
February	3.8	3.09	0.03	0.01	0.02	480	0.33	0.28	0.27	0.31	0.26	0.29
February	3.87	3.38	0.04	0.02	0.02	650	0.3	0.23	0.3	0.28	0.27	0.276
February	3.66	2.99	0.02	0.01	0.01	390	0.27	0.22	0.25	0.27	0.33	0.268
March	3.49	3.01	0.03	0.01	0.02	730	0.23	0.24	0.33	0.19	0.2	0.238
March	5.16	3.93	0.09	0.06	0.03	1680	0.28	0.27	0.31	0.25	0.22	0.266
March	4	3.19	0.04	0.03	0.01	1260	0.19	0.17	0.2	0.16	0.18	0.18
March	3.16	2.98	0.04	0.03	0.01	680	0.28	0.2	0.16	0.18	0.19	0.202
March	3.85	2.81	0.02	0.01	0.01	870	0.23	0.23	0.29	0.21	0.22	0.236
April	3.48	2.88	0.04	0.02	0.02	1266	0.24	0.25	0.22	0.26	0.23	0.24
